# Supplementary material for: Highly efficient solid-state mesoscopic PbS with embedded CuS quantum dot-sensitized solar cells
Source: Royal Society of Chemistry journal article supplement (doi:10.1039/c5ta08668j), 2015-11-27
Supplement: c5ta08668j1.pdf [file c5ta08668j1.pdf]

# **Highly efficient solid-state mesoscopic PbS embedding CuS quantum dot-sensitized solar cells**

*Joong Pill Park,<sup>a</sup> Jin hyuck Heo,<sup>b</sup> Sang Hyuk Im,<sup>b\*</sup> Sang-Wook<sup>a\*</sup>*

<sup>a</sup>Department of Molecular Science and Technology, Ajou University, Suwon 443-749, Korea.

<sup>b</sup>Department of Chemical Engineering, Kyung Hee University 1 Seochon-dong, Giheung-gu, Youngin-si, Gyeonggi-do 446-701, Republic of Korea.

\* E-mail: swkim@ajou.ac.kr,

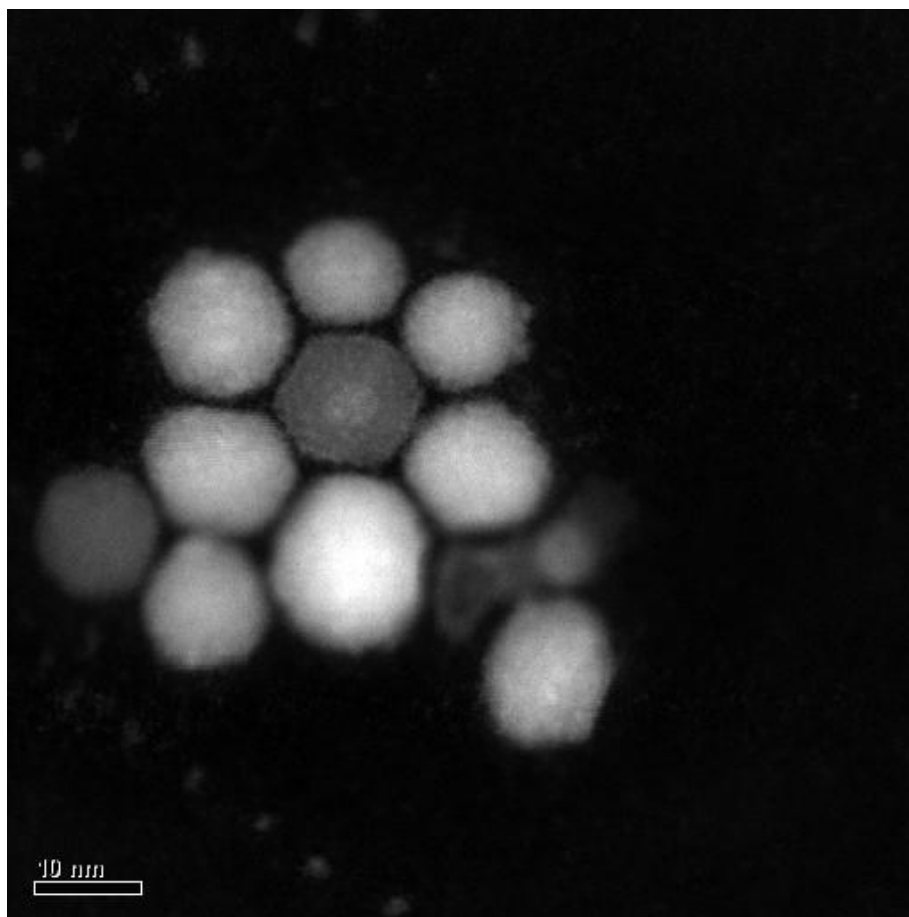

S1. STEM image of PbS[CuS] (Cu:S = 2:1 sample).

Forming hexagonal - shaped CuS nanoparticles

Electron Image 6

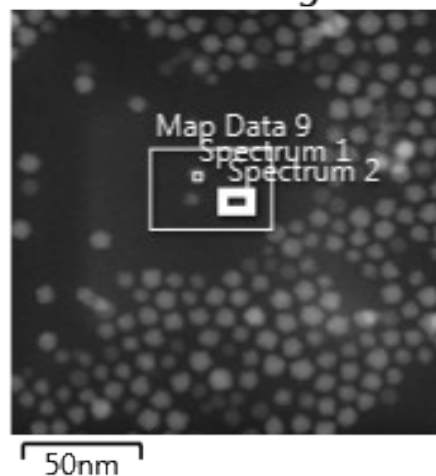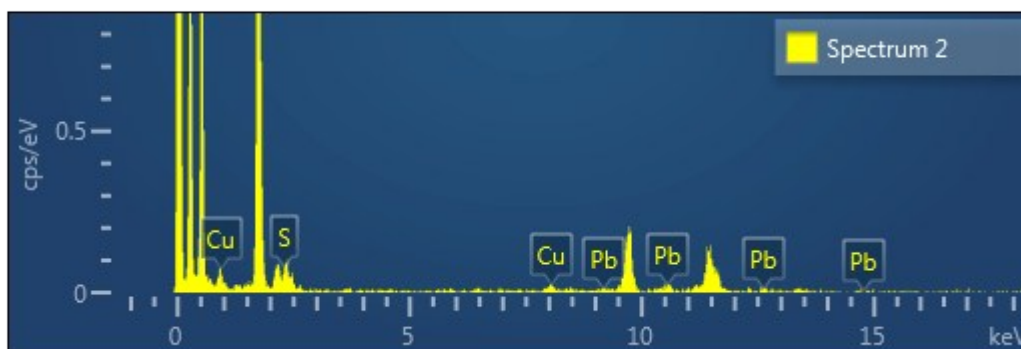

| Element       | Line Type | k factor | Absorption Correction | Wt%    | Wt% Sigma | Atomic % |
|---------------|-----------|----------|-----------------------|--------|-----------|----------|
| <b>S</b>      | K series  | 0.98041  | 1.00                  | 15.59  | 7.41      | 46.59    |
| <b>Cu</b>     | K series  | 1.42103  | 1.00                  | 13.75  | 6.25      | 20.74    |
| <b>Pb</b>     | L series  | 3.10728  | 1.00                  | 70.66  | 9.53      | 32.68    |
| <b>Total:</b> |           |          |                       | 100.00 |           | 100.00   |

S2. EDX data of PbS[CuS] QDs (Cu:S = 0.5:1)

|       | Cu    |       | Pb    |       | mol ratio |
|-------|-------|-------|-------|-------|-----------|
|       | ppm   | mol   | ppm   | mol   |           |
| 6.25% | 6.307 | 0.099 | 125.1 | 0.603 | 1:60.9    |
| 12.5% | 13.02 | 0.205 | 125.5 | 0.606 | 1:2.96    |
| 25%   | 18.82 | 0.296 | 84.04 | 0.406 | 1:1.37    |

S3. ICP data of PbS[CuS] QDs (Cu:S = 0.5:1)

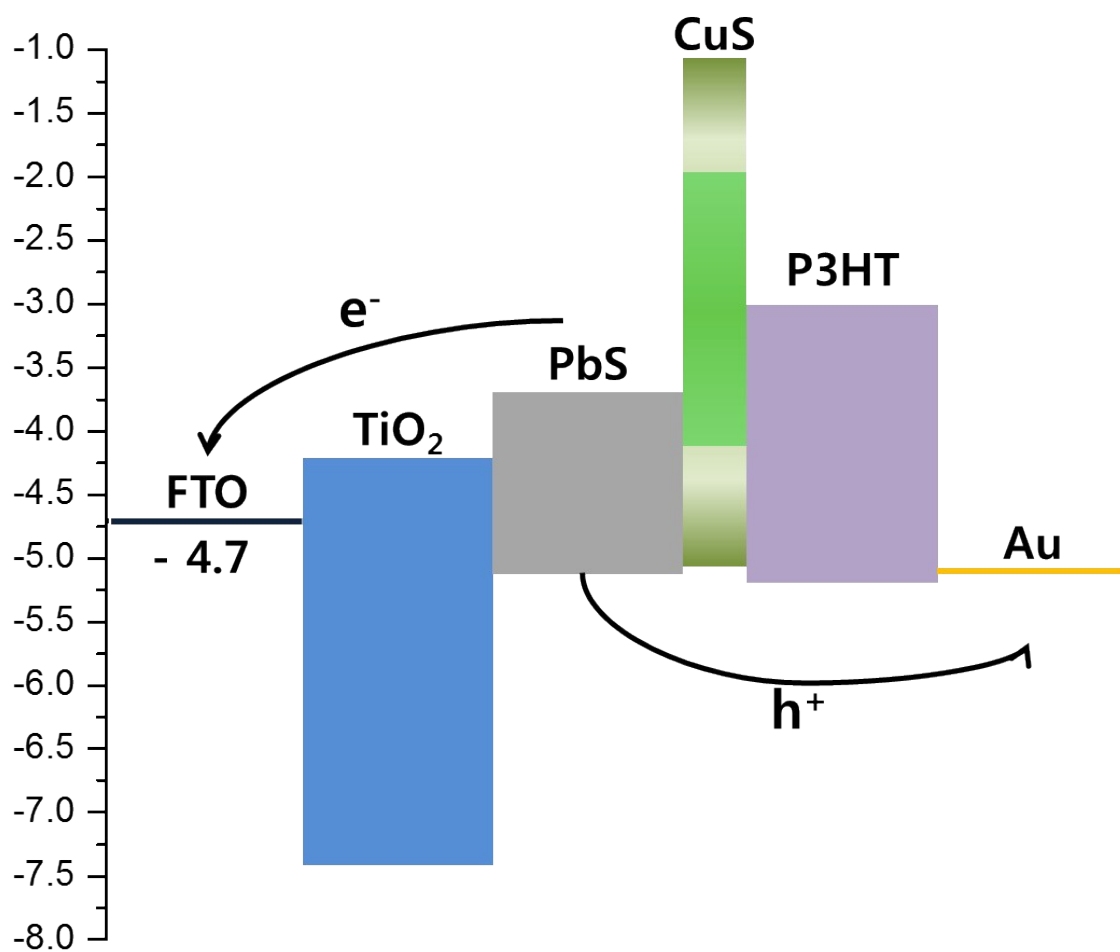

S4. Schematic band offsets of PbS/CuS QDSSc

## Cell Fabrications

Mesoporous  $\text{TiO}_2$  (m- $\text{TiO}_2$ ) electron conductor with  $\sim 500$  nm-thickness was deposited on a blocking  $\text{TiO}_2$  ( $\sim 50$  nm in thickness)/fluorine-doped tin oxide (FTO) glass (TEC 7, Pilkington) by spin coating and subsequent calcination at  $450^\circ\text{C}$  for 1h under air condition. The QDs and molecular linker were deposited sequentially by spin coating. MPA (1% in EtOH) was spin coated at 3000rpm for 30s, washed with acetone and chloroform. PbS/CuS (0.1ml 15 mg/mL in hexane/chlorobenzene (10/1 vol%)) and EDT (1% in EtOH) were sequentially spin coated at 3000 rpm for 30s. Active layer (QD + EDT) deposition was repeated twenty times. poly-3-hexylthiophene (P3HT) were deposited on active layer by spin coating in same manner. Finally, the gold counter electrode with  $50 \sim 60\text{nm}$ -thickness was deposited by thermal evaporation.

The solar cell device was kept under ambient condition (room temperature and air) for stability test. Cell efficiency was obtained after one and two day.
